# Supplementary material for: Preparation of Underrepresented Males for Scientific Careers: A Study of the Dr. John H. Hopps Jr. Defense Research Scholars Program at Morehouse College
Source: Atypon-hosted journal article supplement (doi:10.1187/cbe.15-12-0263), 2016-08-26
Supplement: combinedsupmats.pdf [file combinedsupmats.pdf]

# Supplemental Material

*CBE—Life Sciences Education*

Thompson *et al.*

## Appendix 1

### NSF STEM Classification of Instructional Programs Crosswalk

Listed below is the NSF CIP Code Crosswalk for STEM disciplines.

#### Agricultural Sciences

- 01.09 Animal Sciences
- 01.10 Food Science and Technology
- 01.12 Soil Sciences
- 01.99 Agriculture, Agriculture Operations and Related Sciences, Other
- 03.0101 Natural Resources/Conservation, General
- 03.02 Natural Resources Management and Policy
- 03.03 Fishing and Fisheries Sciences and Management
- 03.05 Forestry
- 03.06 Wildlife and Wildlands Science and Management
- 03.99 Natural Resources and Conservation, Other

#### Chemistry

- 40.05 Chemistry
- 40.0507 Polymer Chemistry
- 40.0509 Environmental Chemistry
- 40.051 Forensic Chemistry
- 40.0511 Theoretical Chemistry
- 40.1002 Materials Chemistry
- 40.1099 Materials Sciences, Other

#### Computer Science

- 11.01 Computer and Information Sciences, General
- 11.0104 Informatics (STEM Only)
- 11.04 Information Science/Studies
- 11.07 Computer Science
- 52.1201 Management Information Systems, General

52.1301 Management Science

#### Engineering

- 14.02 Aerospace, Aeronautical and Astronautical Engineering
- 14.03 Agricultural Engineering
- 14.05 Biomedical/Medical Engineering
- 03.0509 Wood Science and Wood Products/Pulp and Paper Technology
- 14.07 Chemical Engineering
- 14.0702 Chemical and Biomolecular Engineering
- 14.0799 Chemical Engineering, Other
- 14.1003 Laser and Optical Engineering
- 14.1004 Telecommunications Engineering
- 14.1099 Electrical, Electronics and Communications Engineering, Other
- 14.32 Polymer/Plastics Engineering
- 14.4 Paper Science and Engineering
- 14.41 Electromechanical Engineering
- 14.42 Mechatronics, Robotics, and Automation Engineering
- 14.43 Biochemical Engineering
- 14.44 Engineering Chemistry
- 14.45 Biological/Biosystems Engineering
- 15.0306 Integrated Circuit Design
- 15.1502 Engineering Design
- 15.16 Nanotechnology
- 04.02 Architecture
- 14.04 Architectural Engineering
- 14.08 Civil Engineering
- 14.0803 Structural Engineering
- 14.0805 Water Resources Engineering
- 14.14 Environmental/Environmental Health Engineering
- 14.09 Computer Engineering, General
- 14.10 Electrical, Electronics and Communications Engineering
- 14.12 Engineering Physics
- 14.13 Engineering Science
- 14.27 Systems Engineering
- 30.06 Systems Science and Theory
- 14.11 Engineering Mechanics
- 14.19 Mechanical Engineering

14.06 Ceramic Sciences and Engineering  
40.18 Materials Engineering  
14.20 Metallurgical Engineering  
14.28 Textile Sciences and Engineering  
40.10 Materials Science  
14.21 Mining and Mineral Engineering  
14.23 Nuclear Engineering  
14.25 Petroleum Engineering  
14.01 Engineering, General  
14.22 Naval Architecture and Marine  
Engineering  
14.24 Ocean Engineering  
14.99 Engineering, Other

### **Environmental Science**

03.0103 Environmental Studies  
03.0104 Environmental Science

### **Geosciences**

40.06 Geological and Earth  
Sciences/Geosciences  
40.0601 Geology/Earth Science, General

### **Life/Biological Sciences**

26.0403 Anatomy  
26.0202 Biochemistry  
26.01 Biology, General  
26.1101 Biometry/ Biometrics  
26.1102 Biostatistics  
26.1309 Epidemiology  
26.0203 Biophysics  
26.03 Botany/Plant Biology  
26.0305 Plant Pathology/Phytopathology  
26.0307 Plant Physiology  
26.04 Cell/Cellular Biology and  
Anatomical Sciences  
26.0401 Cell/Cellular Biology and  
Histology  
26.0204 Molecular Biology  
26.1301 Ecology  
26.0505 Parasitology  
26.0702 Entomology  
26.0801 Genetics, General

26.0804 Animal Genetics  
26.0805 Plant Genetics  
26.1303 Evolutionary Biology  
26.0806 Human/Medical Genetics  
26.0508 Microbiology and Immunology  
26.0807 Genome Sciences/Genomics  
26.05 Microbiological Sciences and  
Immunology  
26.0507 Immunology  
26.0504 Virology  
26.0503 Medical Microbiology and  
Bacteriology  
26.1501 Neuroscience  
19.05 Foods, Nutrition, and Related  
Services  
30.1901 Nutritional Sciences  
26.0910 Pathology/Experimental Pathology  
26.1001 Pharmacology  
26.1004 Toxicology  
26.1104 Computational Biology  
26.131 Ecology and Evolutionary Biology  
26.0707 Animal Physiology  
26.0901 Physiology, General  
26.09 Physiology, Pathology and Related  
Sciences  
26.07 Zoology/Animal Biology  
26.1201 Biotechnology  
26.1302 Marine Biology and Biological  
Oceanography  
26.99 Biological and Biomedical  
Sciences, Other  
30.01 Biological and Physical Sciences  
30.10 Biopsychology  
30.27 Human Biology  
30.3 Computational Science  
30.32 Marine Sciences

### **Mathematics**

27.01 Mathematics  
27.03 Applied Mathematics  
27.0304 Computational and Applied  
Mathematics  
27.0306 Mathematical Biology  
27.0503 Mathematics and Statistics

14.3701 Operations Research  
27.99 Mathematics and Statistics, Other  
30.08 Mathematics and Computer  
Science  
27.05 Statistics  
52.1304 Actuarial Science

**Physics/Astronomy**

40.02 Astronomy and Astrophysics  
40.0809 Acoustics  
40.08 Physics  
40.0607 Oceanography, Chemical and  
Physical  
40.0807 Optics/Optical Sciences  
40.9999 Physical Sciences, Other
